# Supplementary material for: Trace determination of linear alkylbenzene sulfonates using ionic liquid based ultrasound-assisted dispersive liquid–liquid microextraction and response surface methodology
Source: Royal Society of Chemistry journal article supplement (doi:10.1039/c2ay25302j), 2012-01-01
Supplement: c2ay25302j.pdf [file c2ay25302j.pdf]

**Table S1** Design matrix and responses for central composite design

| Run | A  | B  | C  | D  | E  | Response <sup>a</sup> |
|-----|----|----|----|----|----|-----------------------|
| 1   | 2  | 0  | 0  | 0  | 0  | 0.4287                |
| 2   | 1  | 1  | -1 | -1 | 1  | 0.2475                |
| 3   | -1 | -1 | -1 | -1 | 1  | 0.4323                |
| 4   | 1  | 1  | -1 | 1  | -1 | 0.3051                |
| 5   | -1 | 1  | 1  | 1  | -1 | 0.3018                |
| 6   | 0  | 0  | 0  | 0  | 2  | 0.3655                |
| 7   | 0  | 0  | 0  | 0  | 0  | 0.2719                |
| 8   | 0  | 0  | 0  | 0  | 0  | 0.3168                |
| 9   | 0  | 0  | 0  | 2  | 0  | 0.3150                |
| 10  | -1 | -1 | -1 | 1  | -1 | 0.3631                |
| 11  | -1 | 1  | -1 | -1 | -1 | 0.1664                |
| 12  | 1  | 1  | 1  | 1  | 1  | 0.3826                |
| 13  | 0  | 0  | 0  | -2 | 0  | 0.2729                |
| 14  | 0  | 2  | 0  | 0  | 0  | 0.4648                |
| 15  | 0  | 0  | -2 | 0  | 0  | 0.2729                |
| 16  | 0  | 0  | 2  | 0  | 0  | 0.3440                |
| 17  | 0  | 0  | 0  | 0  | 0  | 0.3023                |
| 18  | 0  | 0  | 0  | 0  | 0  | 0.3082                |
| 19  | 1  | -1 | 1  | 1  | -1 | 0.6121                |
| 20  | 1  | 1  | 1  | -1 | -1 | 0.2417                |
| 21  | -1 | 1  | -1 | 1  | 1  | 0.2916                |
| 22  | 0  | -2 | 0  | 0  | 0  | 0.7206                |

|    |    |    |    |    |    |        |
|----|----|----|----|----|----|--------|
| 23 | -1 | -1 | 1  | -1 | -1 | 0.4530 |
| 24 | -2 | 0  | 0  | 0  | 0  | 0.1261 |
| 25 | -1 | 1  | 1  | -1 | 1  | 0.2527 |
| 26 | -1 | -1 | 1  | 1  | 1  | 0.4627 |
| 27 | 1  | -1 | -1 | -1 | -1 | 0.4889 |
| 28 | 1  | -1 | -1 | 1  | 1  | 0.5680 |
| 29 | 1  | -1 | 1  | -1 | 1  | 0.5151 |
| 30 | 0  | 0  | 0  | 0  | -2 | 0.3018 |

---

<sup>a</sup> Absorbance
